# Supplementary material for: Weighted correlation network and differential expression analyses identify prognostic lncRNA-miRNA-mRNA-ceRNA regulatory network in esophageal squamous cell carcinoma
Source: Research Square preprint supplement (doi:10.21203/rs.3.rs-5721822/v1), 2025-01-20
Supplement: Supplementary file 1 [file 703bba860a93a6373e1066ea.docx]

| **Gene** | **Univariate** | | **Multivariate** | |
| --- | --- | --- | --- | --- |
| **HR** | ***p* value** | **coef** | ***p* value** |
| YAP1 | 0.129247 | 0.000305 | -1.39811 | 0.0537 |
| TBC1D13 | 0.030396 | 0.000607 | -2.28177 | 0.0387 |
| PDZD11 | 43.39173 | 0.000661 | 2.63854 | 0.0578 |
| YIPF6 | 11.88344 | 0.001503 |  |  |
| TNRC6B | 0.092462 | 0.001655 | -1.5242 | 0.0842 |
| PIGA | 6.632492 | 0.002189 |  |  |
| PEX12 | 0.225715 | 0.002963 |  |  |
| DAB2IP | 0.115339 | 0.002963 |  |  |
| JOSD1 | 0.039508 | 0.003796 | -3.00031 | 0.0256 |
| SNRPB2 | 9.605763 | 0.004021 | -1.57932 | 0.1089 |
| MOB4 | 18.10434 | 0.006279 | 1.6848 | 0.1485 |
| FAM122B | 9.915683 | 0.007391 |  |  |
| SMARCB1 | 0.042194 | 0.00972 |  |  |
| DYRK2 | 5.157698 | 0.009773 | 1.55635 | 0.04 |
| RBM27 | 10.77946 | 0.009906 | 2.59192 | 0.0196 |

HR: hazard regression; YAP1: yes-associated protein 1; TBC1D13: Rab GTPase activating protein; PDZD11: PDZ domain-containing protein 11; YIPF6: Yip1 Domain Family Member 6; TNRC6B: trinucleotide repeat-containing gene 6B; PIGA: Phosphatidylinositol N-acetylglucosaminyltransferase subunit A; PEX12: Peroxisomal Biogenesis Factor 12; DAB2IP: Ras (MIM 190020) GTPase-activating protein; JOSD1: Josephin Domain Containing 1; SNRPB2: Small Nuclear Ribonucleoprotein Polypeptide B2; MOB4: MOB Family Member 4; FAM122B: Family With Sequence Similarity 122B; SMARCB1: SWI/SNF Related, Matrix Associated, Actin Dependent Regulator Of Chromatin, Subfamily B, Member 1; DYRK2: Dual Specificity Tyrosine Phosphorylation Regulated Kinase 2; RBM27: RNA Binding Motif Protein 27
